# Supplementary material for: Mouse Models of Achromatopsia in Addressing Temporal “Point of No Return” in Gene-Therapy
Source: MDPI journal article supplement (doi:10.3390/ijms22158069), 2021-07-28

## Supplementary Materials

### Materials and Methods

#### Sequence “*floxed-miniSTOP*” cassette - 393 bps

Sequence of *floxed-miniSTOP* (393 bps). For clarity corresponding regions of each sequence are highlighted in different colors: loxP, Adenovirus splice acceptor segment 1 and 2, SV40 poly(A).

AACTAGTGGATCCGGAACCCTTAATATAACTTCGTATAGCATAACATTATACGAAGTTATAAA  
CCATGGTAGGGCGCAGTAGTCCAGGGTTTCCTTGATGATGTCATACTTATCCTGTCCCTTTTTT  
TTCCACAGCTCGCGGTGAGGACAACTCTTCGCGGTCTTTCCAGTTAACTGATTAGGGCGCG  
CCTTAATTAAACTTGTTTATTGCAGCTTATAATGGTTACAAATAAAGCAATAGCATCACAAA  
TTTCACAAATAAAGCATTTTTTTCACTGCATTCTAGTTGTGGTTTGTCCAACTCATCAATGTA  
TCTTATCATGTCTGGATCATAACTTCGTATAGCATAACATTATACGAAGTTATTAGGTCCCTCGA  
CCTGCAGCCCAAG

#### Sequence “*ssODN*” - 653 bases

Sequence of Single-stranded oligo donor (653 bases). For clarity corresponding regions of each sequence are highlighted in different colors: 5' homologous (115 bases), *floxed-miniSTOP* (393 bases), 3' homologous (145 bases).

AACACCTCGCCCTCACTCAGACATCAGCTCCATCCCTTCCTGTACTTGGATACTGTCCTTGGC  
AATGCCAGCTTCAGCAAGAAGCTGAGGGAGATAGAGGCCATGATCGCAGTCCAACTAGTGG  
ATCCGGAACCCTTAATATAACTTCGTATAGCATAACATTATACGAAGTTATAAACCATGGTAG  
GGCGCAGTAGTCCAGGGTTTCCTTGATGATGTCATACTTATCCTGTCCCTTTTTTTTCCACAGC  
TCGCGGTGAGGACAACTCTTCGCGGTCTTTCCAGTTAACTGATTAGGGCGCGCCTTAATTA  
AAACTTGTTTATTGCAGCTTATAATGGTTACAAATAAAGCAATAGCATCACAAATTTACAA  
ATAAAGCATTTTTTTCACTGCATTCTAGTTGTGGTTTGTCCAACTCATCAATGTATCTTATCAT  
GTCTGGATCATAACTTCGTATAGCATAACATTATACGAAGTTATTAGGTCCCTCGACCTGCAGC  
CCAAGAAGAGGAAAAGATCTTCAGACTCAGAAGAATCATAAAATGATGAGGAGTCTCTAAG  
CCAAGATGCTACACAAGGCACTCCATAGACACACGCACAAGCACTATAGCATCCATAGATC  
TTGCACCTGGAGAGCCAATCAACCAGAT

#### Sequence “*floxed-STOP*” cassette - 2886 bps

Sequence of *floxed-STOP* cassette (2886 bps). For clarity corresponding regions of each sequence are highlighted in different colors: loxP, Splicing acceptors, SV40 poly(A).

CGCGGTCTTTCCAGTGGTTAATTAAATAACTTCGTATAGCATAACATTATACGAAGTTATGGCC  
AGCCTAAGCTAGAGTTTGAATGTAGCCTATACAAGACCCTGTCTCAAAAACCAAGCAAAAGT  
AAAACCCCAGGAACTGGGGGTTTGTATGCCTCTCCTGAACTAATTAATATCTATCTCCCCTT  
CTTCATTTCTTAAAGGAAGAATTCCTGTCCCTTTTTTTTCCACAGAATTCACCGACTGTGGTG  
AATGGAATGTATGTCCTTTCCAGAACCTGGTCCACTAAGATACATTGATGAGTTTGGACAAA  
CCACAACCTAGAATGCAGTGAAAAAATGCTTTATTTGTGAAATTTGTGATGCTATTGCTTTAT

TTGTAACCATTATAAGCTGCAATAAACAAGTTTACCACATTTGTAGAGGTTTTACTTGCTTTAA  
AAAACCTCCCACACCTCCCCCTGAACCTGAAACATAAAAATGAATGCAATTGTTGTTGTTGTA  
AATATAAAATTTTTAAGTGTATAATGTGTTAAACTACTGATTCTAATTGTTTGTGTATTTTAGT  
AAGATACATTGATGAGTTTGGACAAACCACAAGTGAATGCAGTGAAAAAAATGCTTTATTT  
GTGAAATTTGTGATGCTATTGCTTTATTTGTAACCATTATAAGCTGCAATAAACAAGTTCTTAG  
AGCTTTAAATCTCTGTAGGTAGTTTGTCCAATTATGTCACACCACAGAAGTAAGGTTCTTCA  
CAAAGATCCCTCGACCAGACATGAGTAAATATAAAATTTTTAAGTGTATAATGTGTTAAACT  
ACTGATTCTAATTGTTTGTGTATTTTAGTAAGATACATTGATGAGTTTGGACAAACCACAAGT  
AGAATGCAGTGAAAAAAATGCTTTATTTGTGAAATTTGTGATGCTATTGCTTTATTTGTAACC  
ATTATAAGCTGCAATAAACAAGTTCTTAGAGCTTTAAATCTCTGTAGGTAGTTTGTCCAATTA  
TGTCACACCACAGAAGTAAGGTTCTTCAAAAGATCCCTCGACCAGACATGAGAAGTTCTT  
ATTCTCTAGAAAGTATAGGAACTTCGGGTAGGGGAGGCGCTTTTCCCAAGGCAGTCTGGAGC  
ATGCGCTTTAGCAGCCCCGCTGGGCACTTGGCGCTACACAAGTGGCCTCTGGCCTCGCACAC  
ATTCCACATCCACCGGTAGGCGCCAACCGGCTCCGTTCTTTGGTGGCCCCCTTCGCGCCACCTT  
CTACTCCTCCCCTAGTCAGGAAGTTCCCCCCCCGCCCCGCAGCTCGCGTCGTGCAGGACGTGA  
CAAATGGAAGTAGCACGTCTCACTAGTCTCGTGCAGATGGACAGCACCGCTGAGCAATGGA  
AGCGGGTAGGCCTTTGGGGCAGCGGCCAATAGCAGCTTTGCTCCTTCGCTTTCTGGGCTCAGA  
GGCTGGGAAGGGGTGGGTCCGGGGGCGGGCTCAGGGGCGGGCTCAGGGGCGGGGCGGGCG  
CCCGAAGGTCCTCCGGAGGCCCCGGCATTCTGCACGCTTCAAAGCGCACGTCTGCCGCGCTG  
TTCTCCTCTTCTCATCTCCGGGCCTTTCGACCTGCAGCCTGTTGACAATTAATCATCGGCATA  
GTATATCGGCATAGTATAATACGACAAGGTGAGGAACTAAACCATGGGATCGGCCATTGAA  
CAAGATGGATTGCACGCAGGTTCTCCGGCCGCTTGGGTGGAGAGGCTATTCGGCTATGACTG  
GGCACAACAGACAATCGGCTGCTCTGATGCCGCCGTGTTCCGGCTGTCAGCGCAGGGGCGCC  
CGGTTCTTTTTGTCAAGACCGACCTGTCCGGTGCCCTGAATGAACTGCAGGACGAGGCAGCG  
CGGCTATCGTGGCTGGCCACGACGGGCGTTTCTTGCGCAGCTGTGCTCGACGTTGTCACTGAA  
GCGGGAAGGGACTGGCTGCTATTGGGCGAAGTGCCGGGGCAGGATCTCCTGTCATCTCACCT  
TGCTCCTGCCGAGAAAGTATCCATCATGGCTGATGCAATGCGGCGGCTGCATACGCTTGATC  
CGGCTACCTGCCCATTCGACCACCAAGCGAAACATCGCATCGAGCGAGCACGTACTCGGAT  
GGAAGCCGGTCTTGTGATCAGGATGATCTGGACGAAGAGCATCAGGGGCTCGCGCCAGCC  
GAACTGTTCCGCCAGGCTCAAGGCGCGCATGCCCCACGGCGATGATCTCGTCGTGACCCATGG  
CGATGCCTGCTTGCCGAATATCATGGTGGAATGGCCGCTTTTCTGGATTCATCGACTGTGG  
CCGGCTGGGTGTGGCGGACCGCTATCAGGACATAGCGTTGGCTACCCGTGATATTGCTGAAG  
AGCTTGGCGGCGAATGGGCTGACCGCTTCCTCGTGCTTTACGGTATCGCCGCTCCCGATTTCG  
AGCGCATCGCCTTCTATCGCCTTCTTGACGAGTTCTTCTGAGGGGATCAATTCTCTAGAGCTC  
GCTGATCAGCCTCGACTGTGCCTTCTAGTTGCCAGCCATCTGTTGTTTGCCCCCTCCCCCGTGCC  
TTCCTTGACCCTGGAAGGTGCCACTCCCCTGTCCTTTCTAATAAAAATGAGGAAATTGCATC  
GCATTGTCTGAGTAGGTGTCATTCTATTCTGGGGGGTGGGGTGGGGCAGGACAGCAAGGGGG  
AGGATTGGGAAGACAATAGCAGGCATGCTGGGGATGCGGTGGGCTCTATGGCTTCTGAGGC  
GGAAAGAACCAGCTGGGGCTCGACTAGAGCTTGCGGAACCCTTCGAAGTTCCTATTCTCTAG  
AAAGTATAGGAACTTCATAACTTCGTATAGCATAACATTATACGAAGTTATGGTACCGCGAGA  
CCCACGCTCACCGGC

**Figure S1. Electroretinography of three founder mice from *Easi*-CRISPR.**

Photopic serial intensity ERG showed decreased *b*-wave amplitudes in #6 founder mouse (homozygous-like knock-in) compared to #2 (heterozygous-like knock-in) and #3 (no knock-in) founder mice. PCR results of these founder mice were showed in Figure 2C.

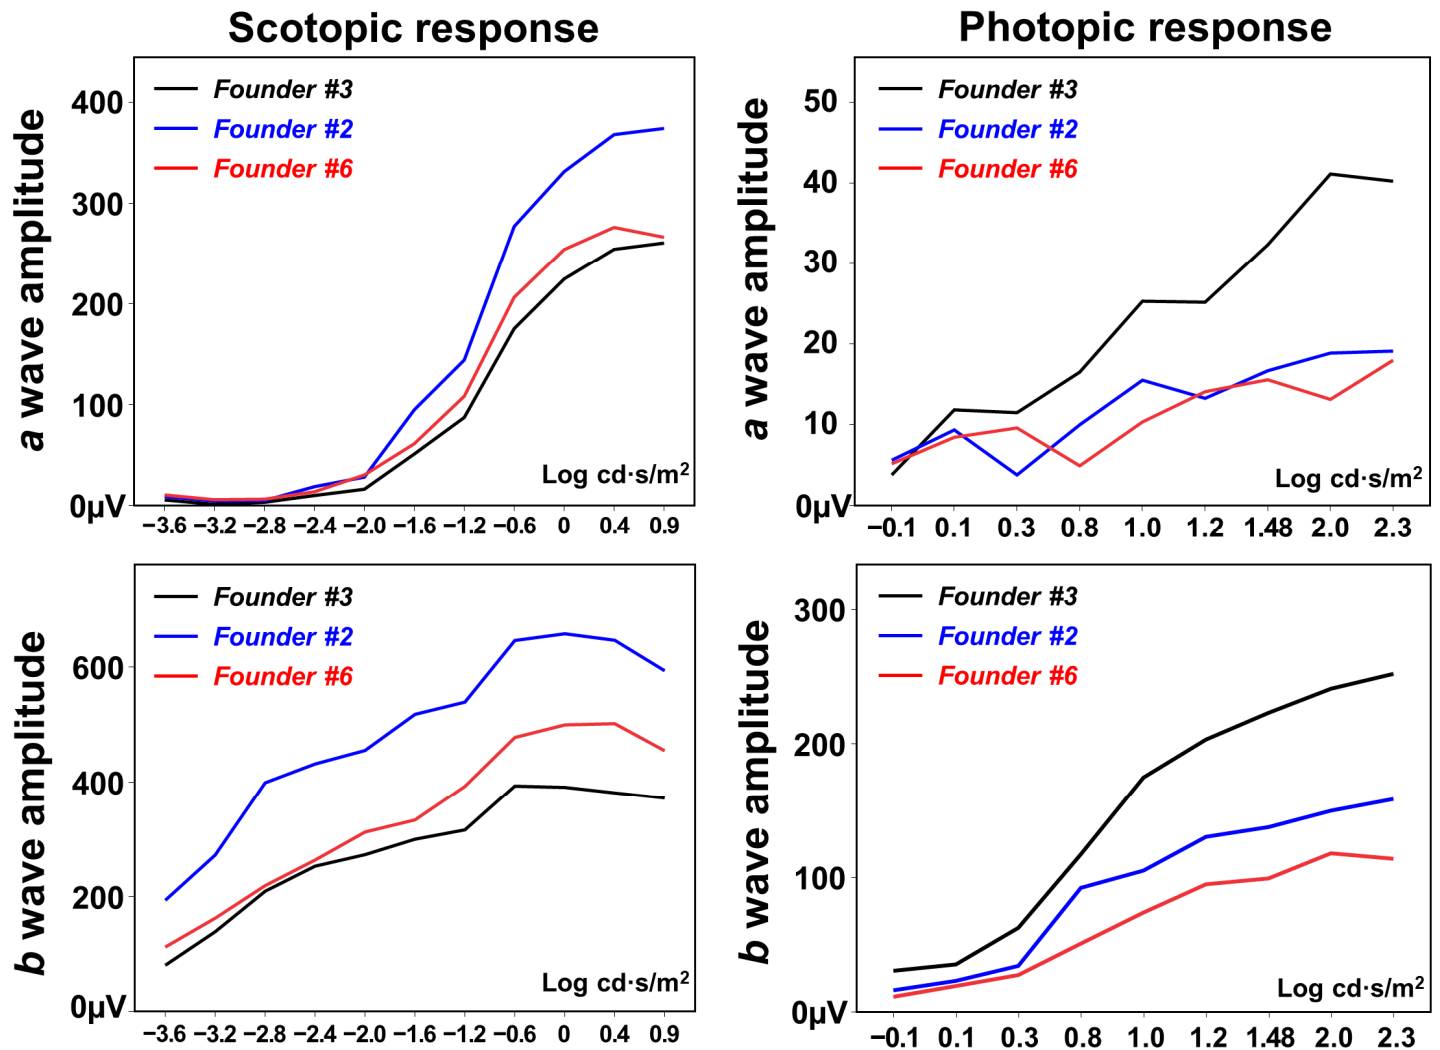

**Figure S2. Histology of *Cnga3*<sup>floxed-miniSTOP</sup> mice at 6 months old**

There was no difference in terms of outer nuclear layer between *Cnga3*<sup>+/+</sup>, *Cnga3*<sup>floxed-miniSTOP/+</sup> and *Cnga3*<sup>floxed-miniSTOP</sup> mice from the same litter at 6 months old.

***CNGA3*<sup>+/+</sup>**

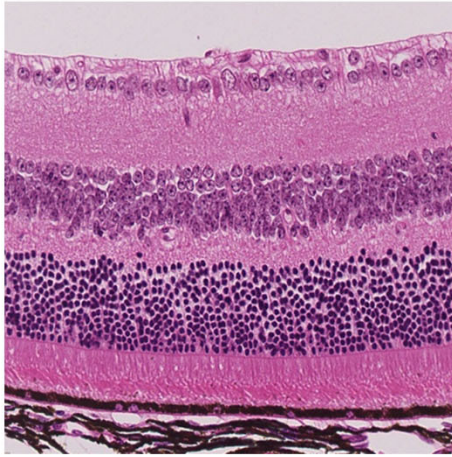

***CNGA3*<sup>floxed-miniSTOP/+</sup>**

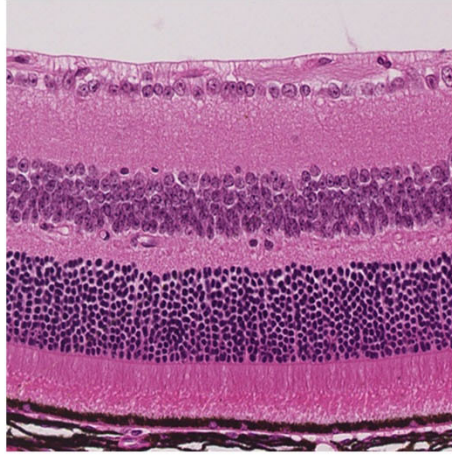

***CNGA3*<sup>floxed-miniSTOP</sup>**

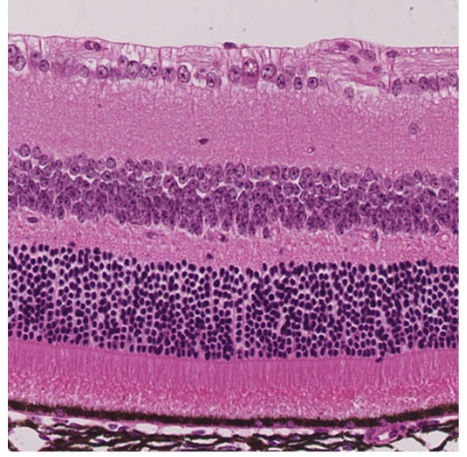

Supplement: s1 [file s1]
